# Supplementary material for: Pigment Epithelium-Derived Factor (PEDF) Receptors Are Involved in Survival of Retinal Neurons
Source: PubMed Central journal article supplement (PMC7795132; doi:10.3390/ijms22010369), 2020-12-31
Supplement: ijms-22-00369-s001.pdf [file ijms-22-00369-s001.pdf]

Supplementary material

**Pigment Epithelium-Derived Factor (PEDF) Receptors are involved in  
Survival of Retinal Neurons**

Susanne Bürger, Jie Meng, Annette Zwanzig, Mike Beck, Maik Pankonin, Peter  
Wiedemann, Wolfram Eichler, Jan Darius Unterlauff

**Supplementary Figures**

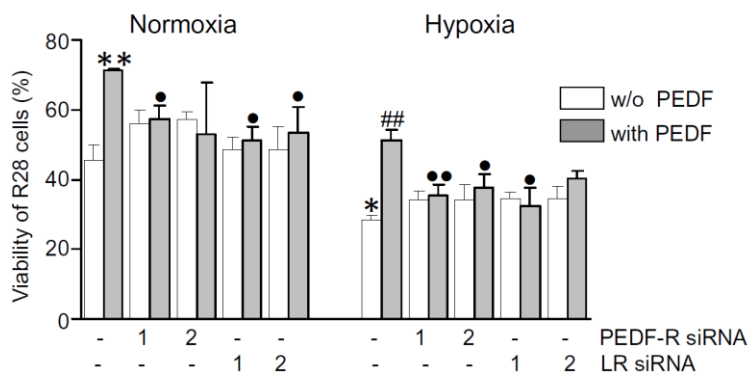

**Supplementary Fig. S1.** The viability of differentiated R28 cells was determined under normoxia and hypoxia, under siRNA-mediated PEDF-R and LR knockdown and control (—, control siRNA) conditions as well as in the presence or absence of PEDF. R28 cells were cultured in laminin-coated culture plates in the presence of 250  $\mu$ M 8-pCPT-2'-O-Me-cyclic AM, a cell-permeable cAMP analogue. Cell viability was determined using a calcein live/ dead assay. Significant differences to normoxic (\* $P < 0.05$ , \*\* $P < 0.01$ ) or hypoxic (## $P < 0.01$ ) control siRNA-containing, PEDF-free cultures and the significance comparing the effect of PEDF stimulation between control siRNA- and PEDF-R- or LR siRNA-transfected cells (• $P < 0.05$ , •• $P < 0.01$ ) are indicated (means  $\pm$  SEM;  $n = 3$ , one way ANOVA).

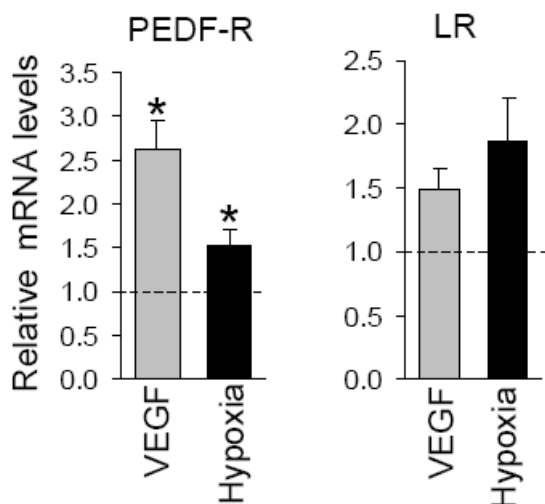

**Supplementary Fig. S2.** PEDF-R and LR mRNA expression in R28 cells is regulated by VEGF and hypoxia. Cells were treated with 50 ng/ml VEGF or incubated at 0.2%  $O_2$  for 4 h. Total RNA was prepared, reverse transcribed and analyzed by qPCR. Shown are relative mRNA levels of PEDF-R and LR relative to normoxia-exposed control cultures (*dashed* lines;  $n = 3 - 4$ , \* $P < 0.05$ ).

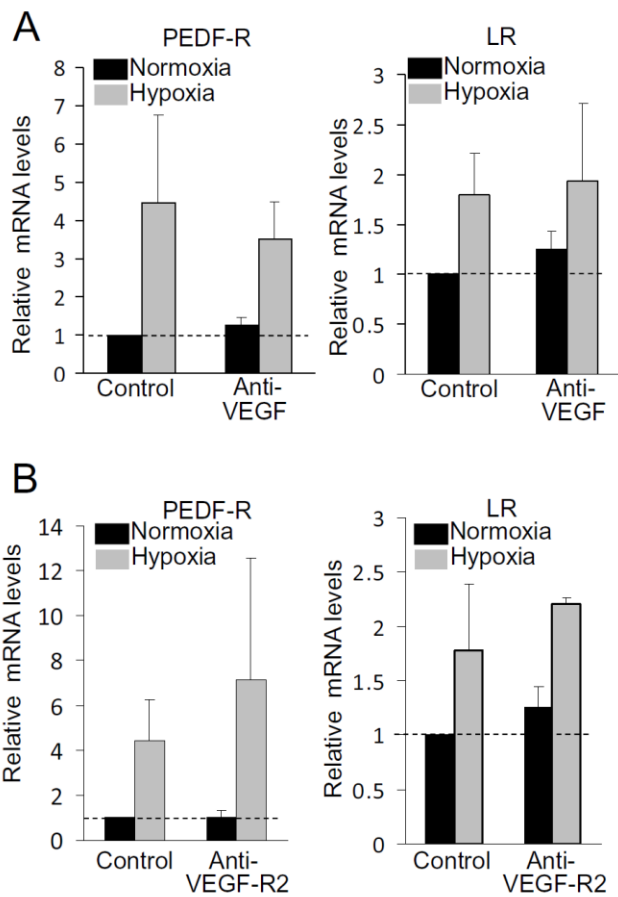

**Supplementary Fig. S3.** Hypoxia-induced PEDF-R and LR mRNA upregulation in R28 cells was not affected by neutralizing antibodies directed to (A) VEGF or (B) VEGF-R2. Cells were incubated at normoxia or hypoxia (0.2% O<sub>2</sub>) in the presence of polyclonal antibodies or non-immune immunoglobulin (control). At 24 h posttreatment, total RNA was prepared and expression of genes of interest was analyzed by semi-quantitative real-time RT-PCR. Levels of PEDF-R or LR are presented relative to normoxia-exposed control cultures (*dashed* lines;  $n = 3$ ).
